# Supplementary material for: Cytokines from the pig conceptus: roles in conceptus development in pigs
Source: PubMed Central journal article supplement (PMC4247618; doi:10.1186/2049-1891-5-51), 2014-11-07

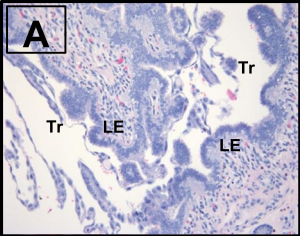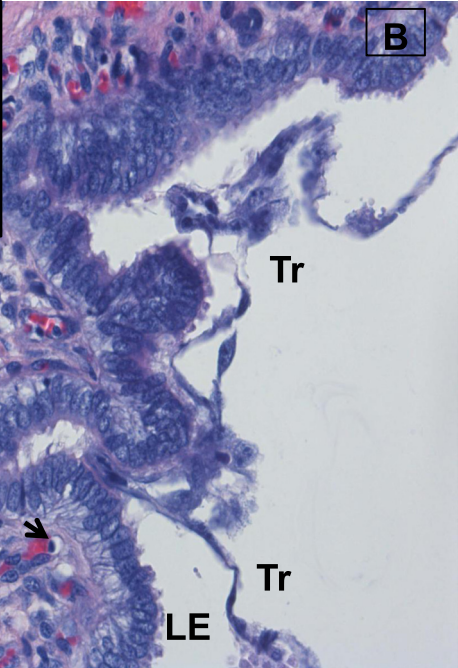

Supplement: 40104_2014_129_MOESM1_ESM.pdf [file 40104_2014_129_MOESM1_ESM.pdf]
